# Supplementary material for: Systematic review with a meta-analysis: clinical effects of statins on the reduction of portal hypertension and variceal haemorrhage in cirrhotic patients
Source: PubMed Central journal article supplement — BMJ Open. 2019 Jul 16;9(7):e030038. doi: 10.1136/bmjopen-2019-030038 (PMC6661584; doi:10.1136/bmjopen-2019-030038), 2019-07-16
Supplement: bmjopen-2019-030038supp001.pdf [file bmjopen-2019-030038supp001.pdf]

## Queries in pubmed

#4,"Search (((Liver Cirrhosis[Mesh] OR liver cirrhosis OR Hypertension, Portal[Mesh] OR Ascites[Mesh] OR Liver Transplantation[Mesh] OR portal hypertension OR ascites OR liver transplant\*)) OR (cirrhosis OR cirrhotic OR fibrosis OR fibrotic))) AND ((statin\* OR monacolin OR Hydroxymethylglutaryl-CoA Reductase Inhibitors[Pharmacological Action] OR Hydroxymethylglutaryl-CoA Reductase Inhibitors[Mesh] OR Hydroxymethylglutaryl-CoA Reductase Inhibitors OR Hydroxymethylglutaryl-CoA Reductase Inhibitor OR HMG coa reductase inhibitor OR HMG coa reductase inhibitors OR HMG-coa reductase inhibitor OR HMG-coa reductase inhibitors OR atorvastatin OR lipton OR lipitor OR CI 981 OR CI-981 OR simvastatin OR synvinolin OR zocor OR MK733 OR MK 733 OR MK-733 OR rosuvastatin OR ZD4522 OR crestor OR cerivastatin OR rivastatin OR Bay w 6228 OR bayol OR lipobay))) AND (((randomized controlled trial) OR (controlled clinical trial) OR (randomized[tiab]) OR (placebo[tiab]) OR (drug therapy[sh]) OR (randomly[tiab]) OR (trial[tiab]) OR (groups[tiab])))

#3,"Search ((randomized controlled trial) OR (controlled clinical trial) OR (randomized[tiab]) OR (placebo[tiab]) OR (drug therapy[sh]) OR (randomly[tiab]) OR (trial[tiab]) OR (groups[tiab]))

#2,"Search (statin\* OR monacolin OR Hydroxymethylglutaryl-CoA Reductase Inhibitors[Pharmacological Action] OR Hydroxymethylglutaryl-CoA Reductase Inhibitors[Mesh] OR Hydroxymethylglutaryl-CoA Reductase Inhibitors OR Hydroxymethylglutaryl-CoA Reductase Inhibitor OR HMG coa reductase inhibitor OR HMG coa reductase inhibitors OR HMG-coa reductase inhibitor OR HMG-coa reductase inhibitors OR atorvastatin OR lipton OR lipitor OR CI 981 OR CI-981 OR simvastatin OR synvinolin OR zocor OR MK733 OR MK 733 OR MK-733 OR rosuvastatin OR ZD4522 OR crestor OR cerivastatin OR rivastatin OR Bay w 6228 OR bayol OR lipobay)

#1,"Search ((Liver Cirrhosis[Mesh] OR liver cirrhosis OR Hypertension, Portal[Mesh] OR Ascites[Mesh] OR Liver Transplantation[Mesh] OR portal hypertension OR ascites OR liver transplant\*)) OR (cirrhosis OR cirrhotic OR fibrosis OR fibrotic)
