# Supplementary material for: Systematic review with a meta-analysis: clinical effects of statins on the reduction of portal hypertension and variceal haemorrhage in cirrhotic patients
Source: PubMed Central journal article supplement — BMJ Open. 2019 Jul 16;9(7):e030038. doi: 10.1136/bmjopen-2019-030038 (PMC6661584; doi:10.1136/bmjopen-2019-030038), 2019-07-16
Supplement: bmjopen-2019-030038supp002.pdf [file bmjopen-2019-030038supp002.pdf]

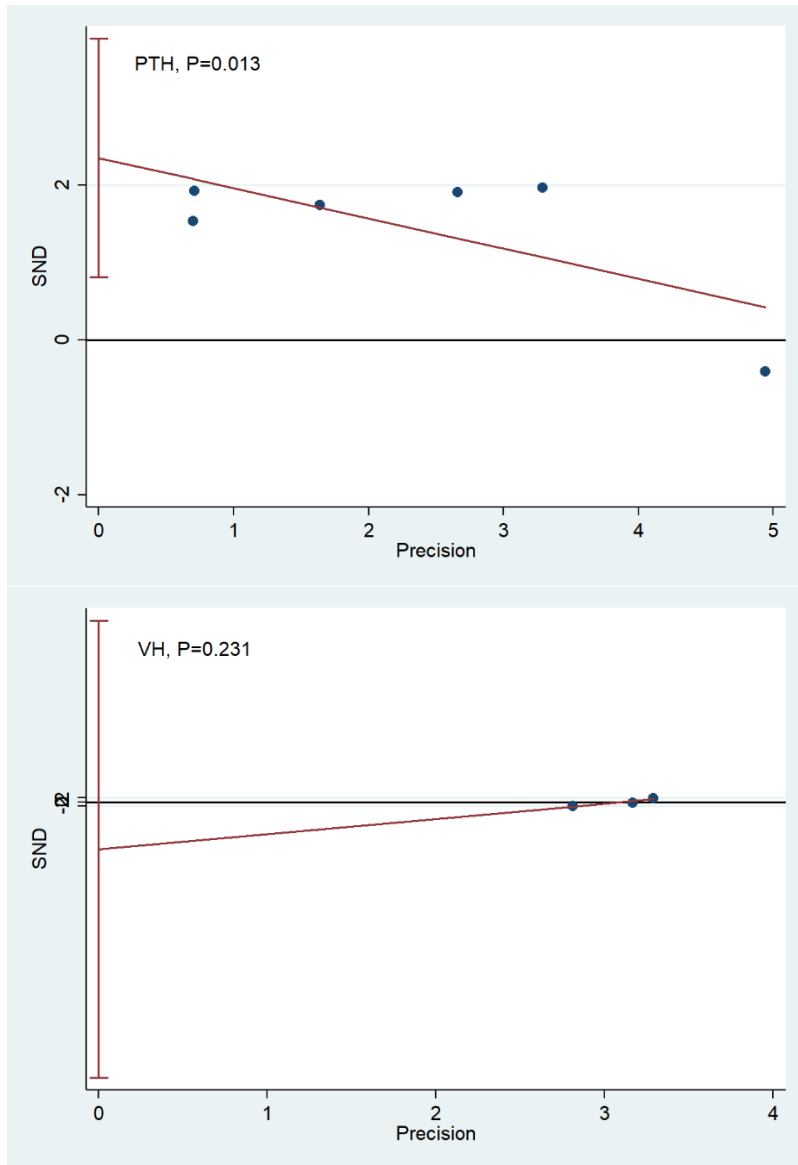

**Supplementary Figure 1. Egger's test to identify publication bias. SND, standard normal deviation; PTH, portal hypertension; VH, variceal haemorrhage.**
